# Supplementary material for: A comparison of cine CMR imaging at 0.55 T and 1.5 T
Source: Springer Nature journal article supplement (doi:10.1186/s12968-020-00618-y), 2020-01-01

# Breath-held cine: Comparison of LV volume and function measurements

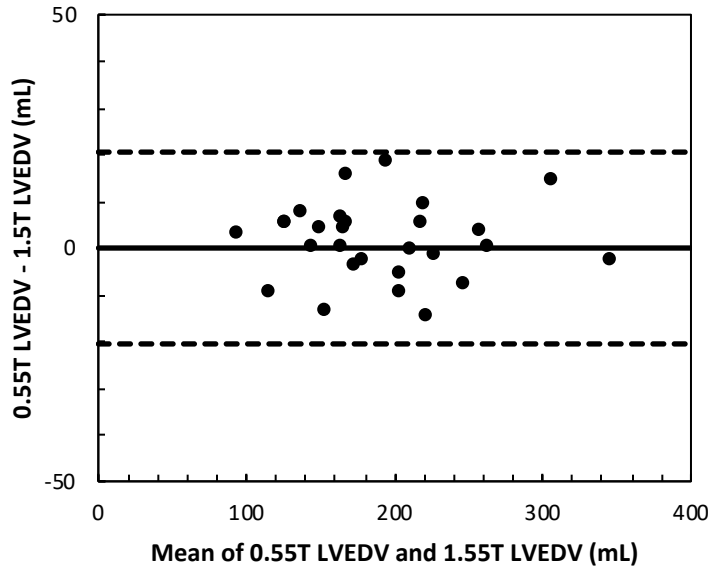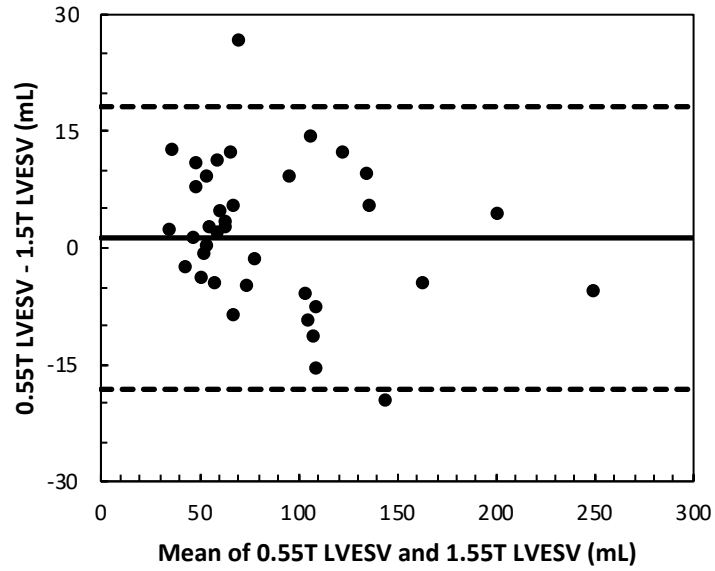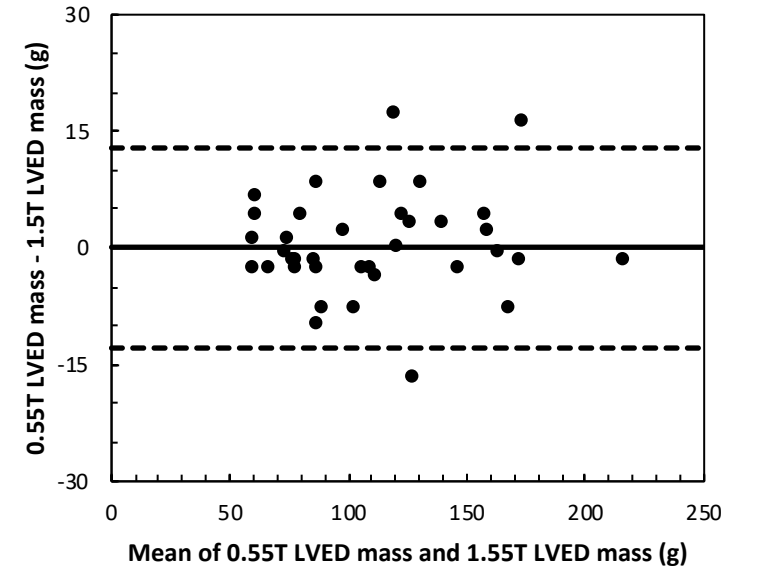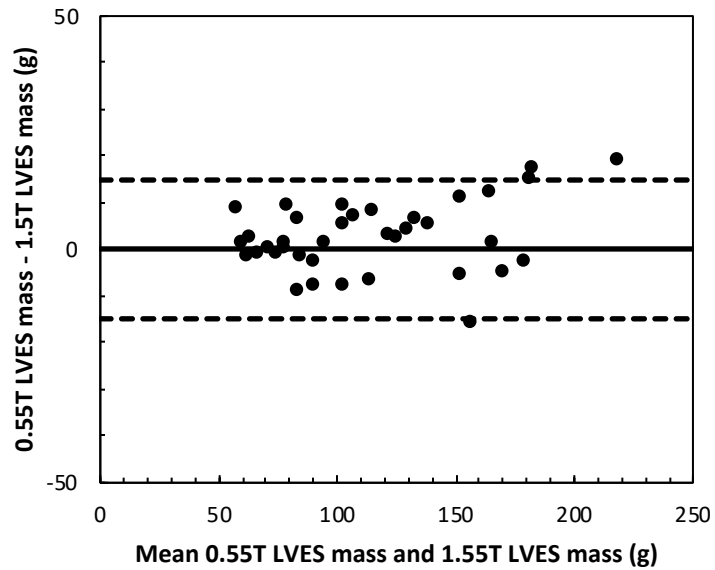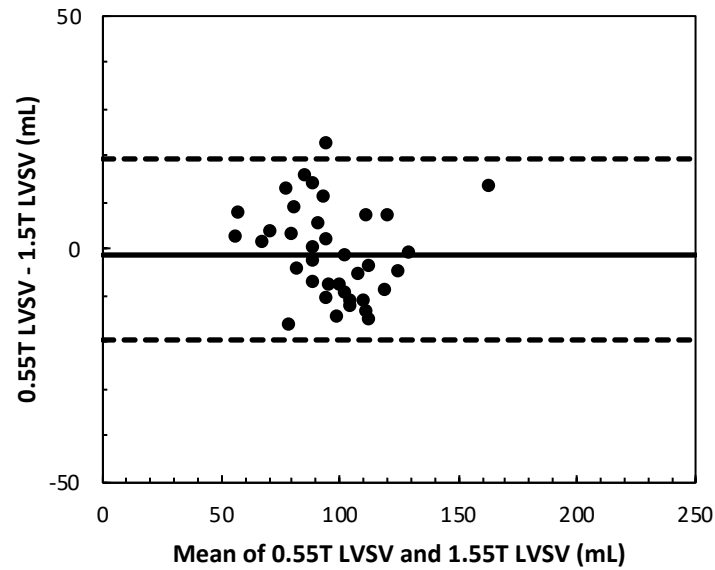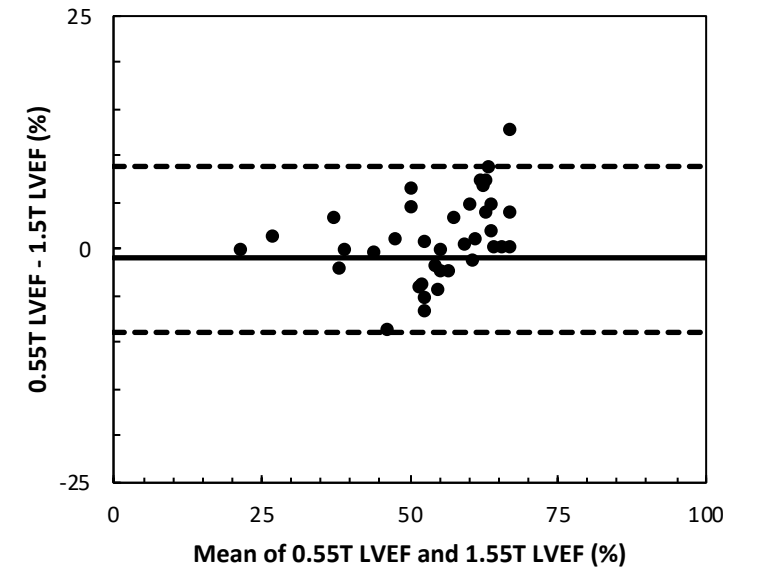

# Breath-held cine: Comparison of RV volume and function measurements

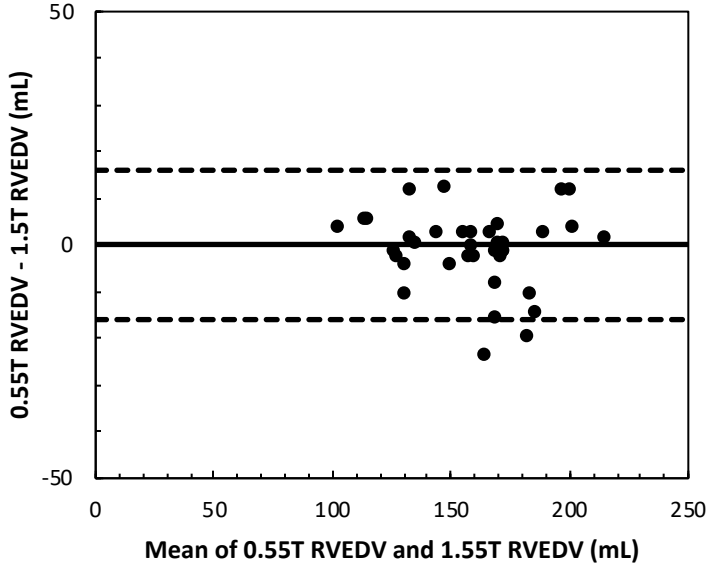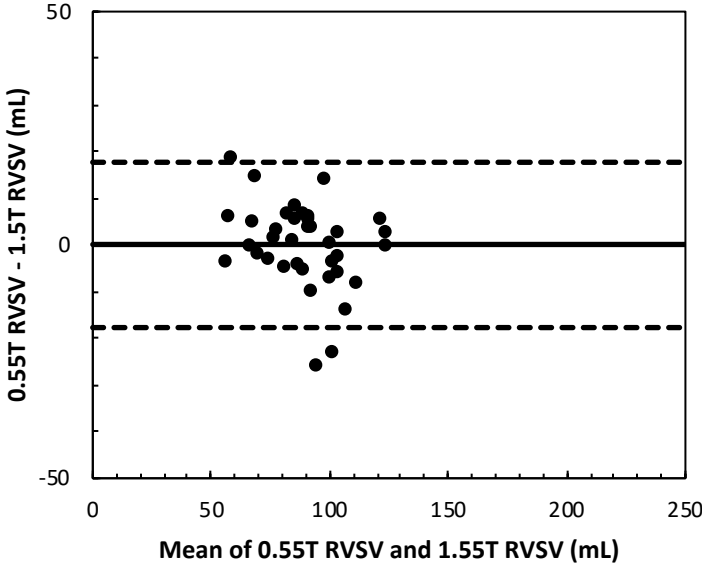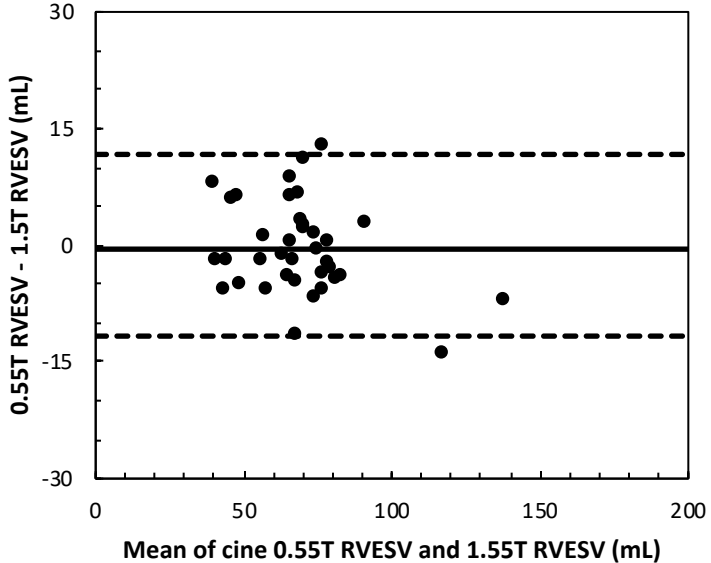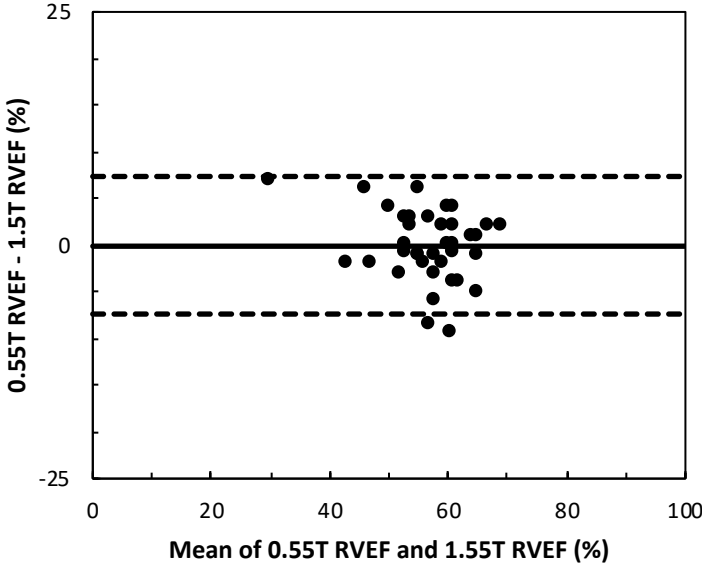

# Free-breathing re-binned cine: Comparison of LV volume and function measurements

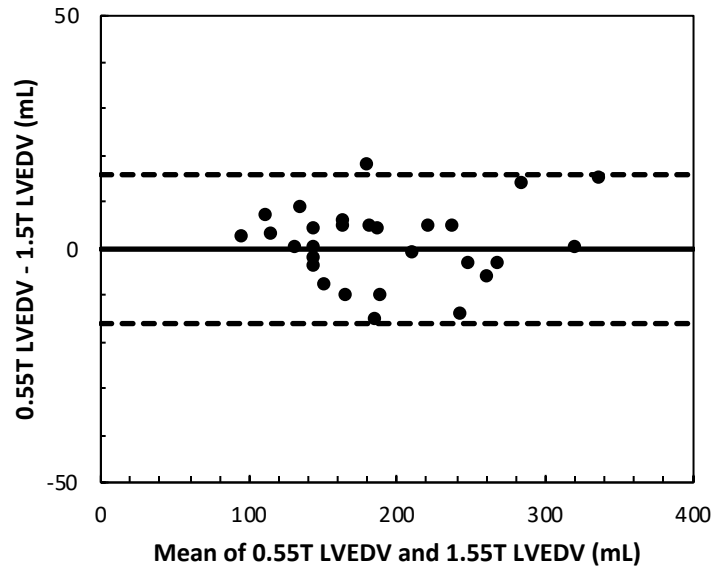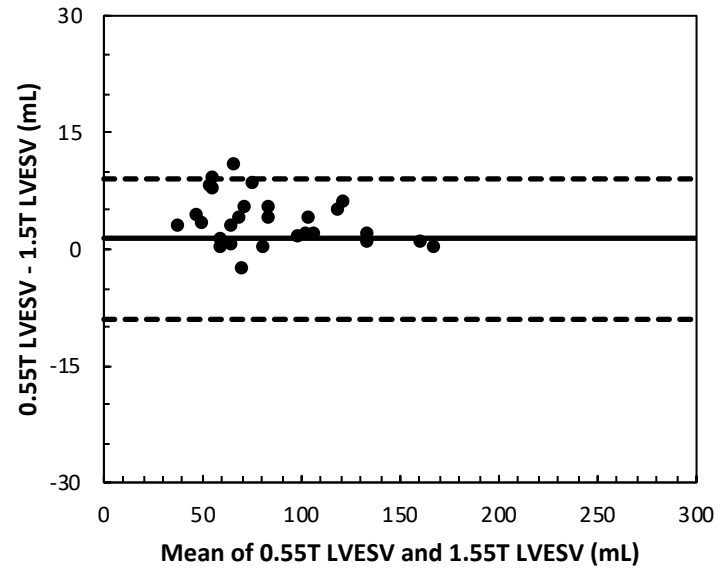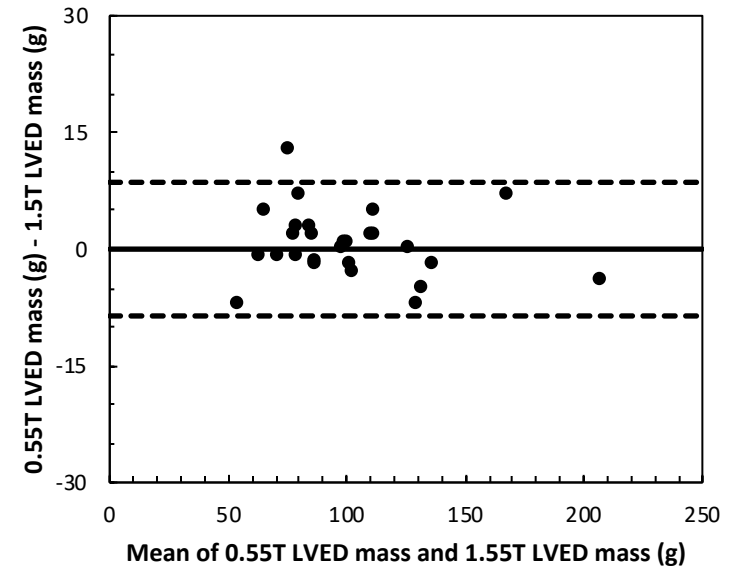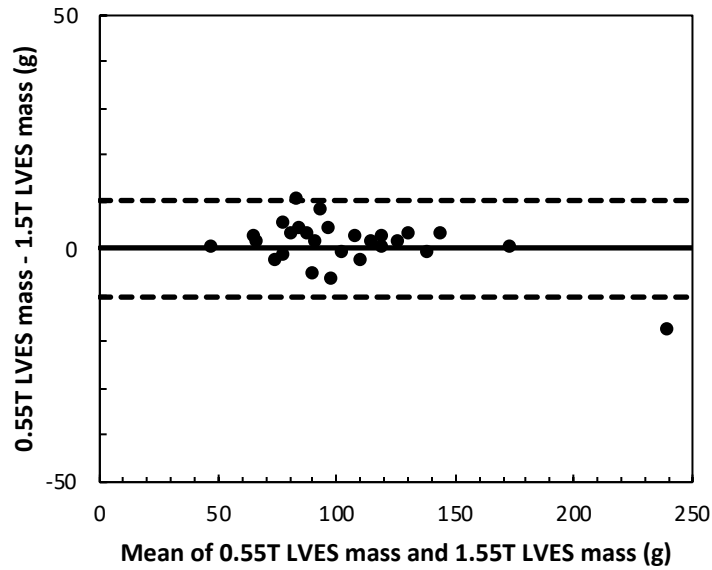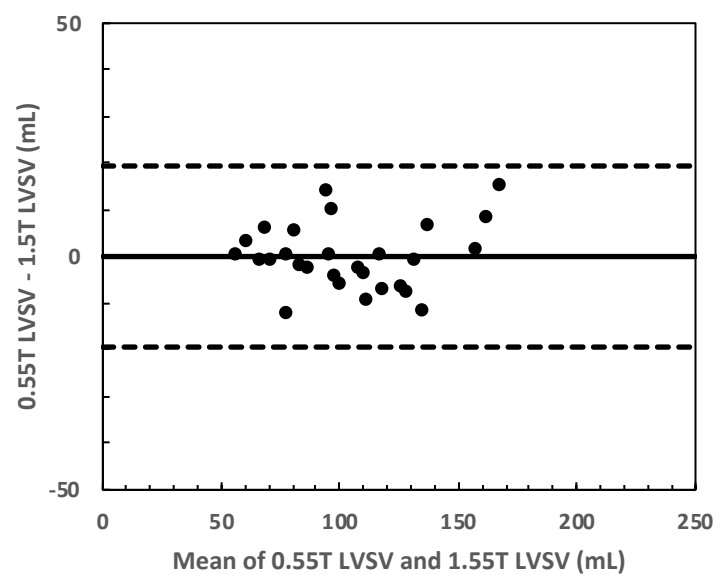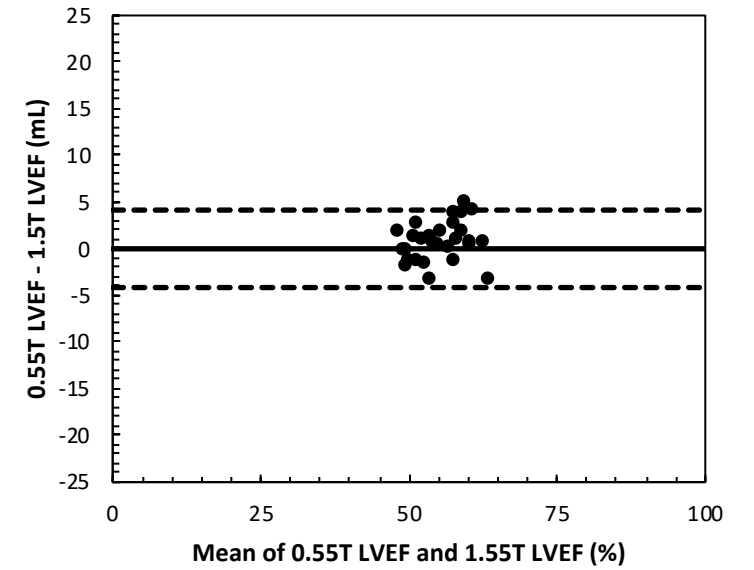

# Free-breathing re-binned cine: Comparison of RV volume and function measurements

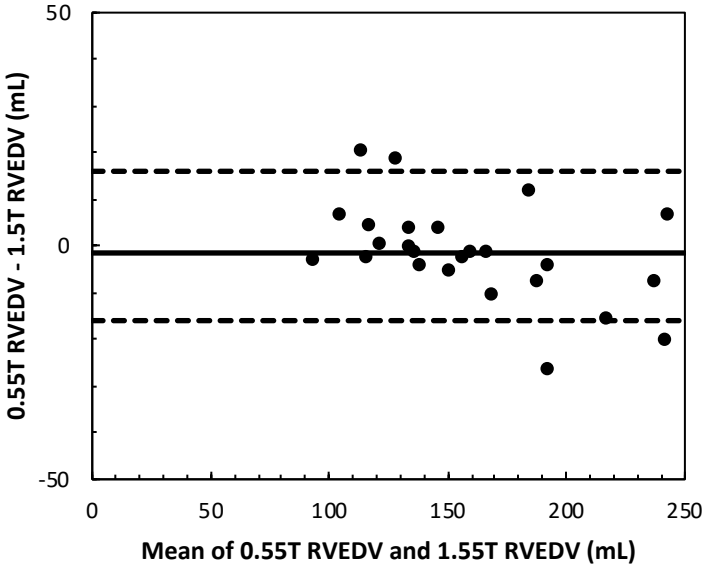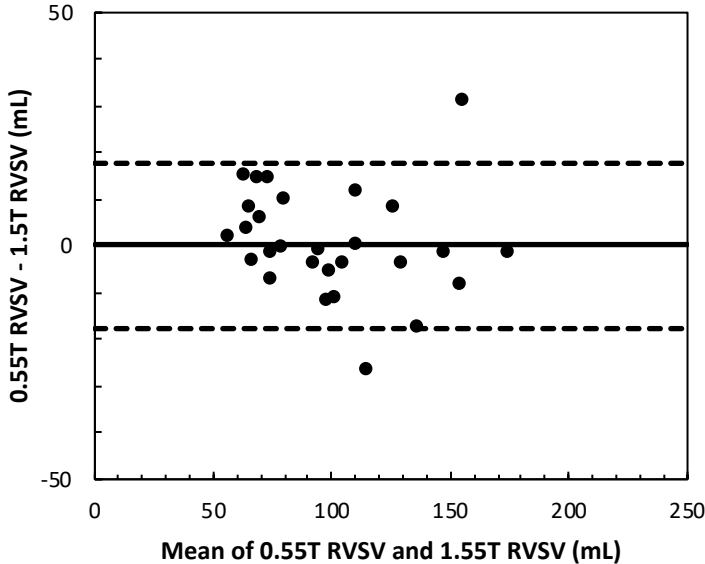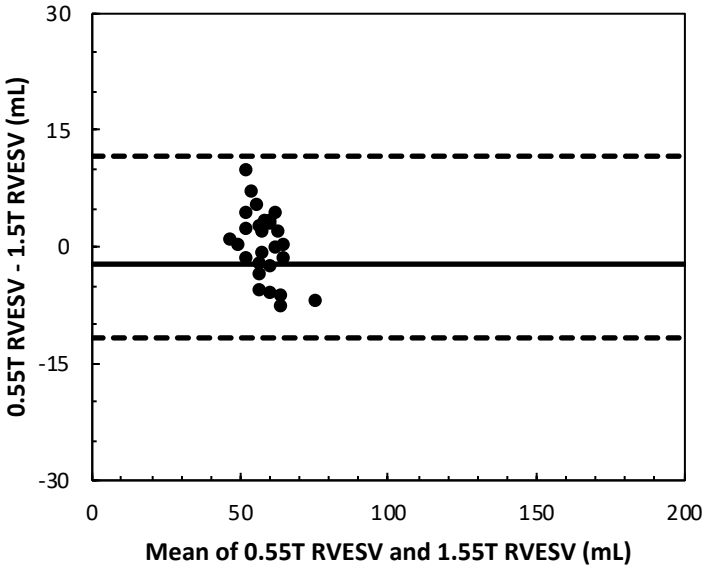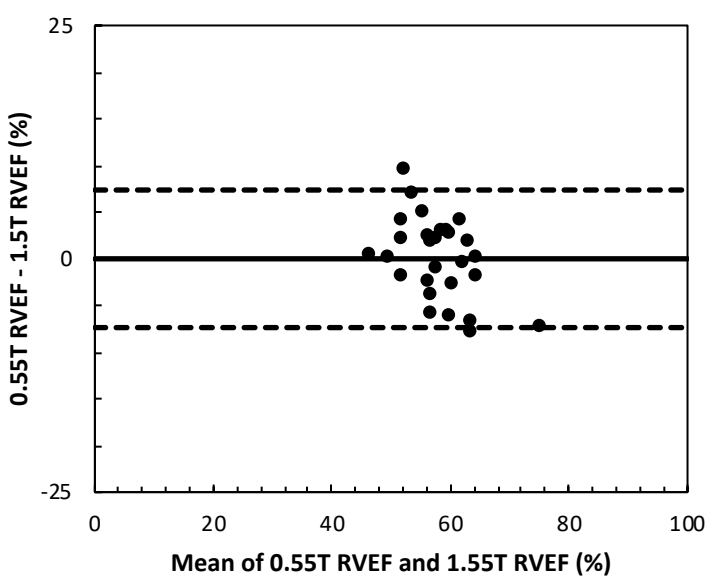

Supplement: MOESM4 [file 17993142]
